# Supplementary material
Source: publisher figshare collection journal article supplement (https://sage.figshare.com/ndownloader/files/14625545)
Supplement: Supplementary file 1 [file 14625545]

## WELLBEING SCORE

Name.....

Evaluator.....

BASELINE RATING SCALE:

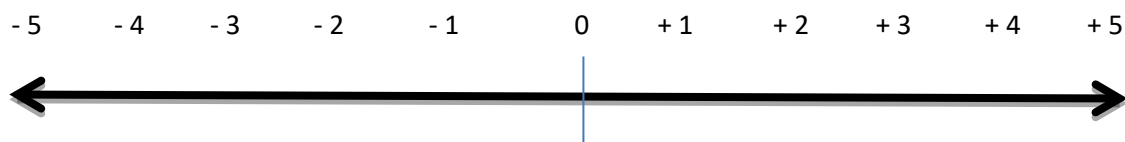

| NEGATIVE WELLBEING INDICATORS<br>OBSERVED | POSITIVE WELLBEING INDICATORS<br>OBSERVED |
|-------------------------------------------|-------------------------------------------|
| - 5: very significant evidence            | + 5: very significant evidence            |
| - 4: significant evidence                 | + 4: significant evidence                 |
| - 3: moderate evidence                    | + 3: moderate evidence                    |
| - 2: mild evidence                        | + 2: mild evidence                        |
| - 1: slight evidence                      | + 1: slight evidence                      |
| 0: None observed or asleep                |                                           |

| EXAMPLES OF NEGATIVE WELLBEING<br>INDICATORS                                                                                                                                                                                                                                                                                                                                                                                                                                                                                                                                                                                                                                                                                                                                                                                                                                                                                                                                                                          | EXAMPLES OF POSITIVE WELLBEING<br>INDICATORS                                                                                                                                                                                                                                                                                                                                                                                                                                                                                                                                                                                                                                                                                                                                                                                                      |
|-----------------------------------------------------------------------------------------------------------------------------------------------------------------------------------------------------------------------------------------------------------------------------------------------------------------------------------------------------------------------------------------------------------------------------------------------------------------------------------------------------------------------------------------------------------------------------------------------------------------------------------------------------------------------------------------------------------------------------------------------------------------------------------------------------------------------------------------------------------------------------------------------------------------------------------------------------------------------------------------------------------------------|---------------------------------------------------------------------------------------------------------------------------------------------------------------------------------------------------------------------------------------------------------------------------------------------------------------------------------------------------------------------------------------------------------------------------------------------------------------------------------------------------------------------------------------------------------------------------------------------------------------------------------------------------------------------------------------------------------------------------------------------------------------------------------------------------------------------------------------------------|
| <ul style="list-style-type: none"> <li>- <i>physically tense (face &amp; body)</i></li> <li>- <i>lack of/avoiding eye contact</i></li> <li>- <i>facially blank/unresponsive</i></li> <li>- <i>lack of/avoiding interaction</i></li> <li>- <i>negative facial expression (grimace, frown, forced smile, rolling eyes, mimicry)</i></li> <li>- <i>sighing, tutting, muttering, shaking head, blocking ears</i></li> <li>- <i>rejecting direct interaction (verbal or musical)</i></li> <li>- <i>restlessness, unable to remain seated</i></li> <li>- <i>reduced energy and concentration</i></li> <li>- <i>intrusive to others, continuous talk</i></li> <li>- <i>irritability &amp; agitation – verbal comments, verbal hostility to staff or group members</i></li> <li>- <i>aggression - shouting, abusive, over-forceful use of instruments – throwing, hitting</i></li> <li>- <i>distress – crying, wailing, screaming</i></li> <li>- <i>leaving the group either spontaneously or removed by staff</i></li> </ul> | <ul style="list-style-type: none"> <li>- <i>physically settled /relaxed</i></li> <li>- <i>increased alertness</i></li> <li>- <i>open body language</i></li> <li>- <i>smiling</i></li> <li>- <i>eye contact</i></li> <li>- <i>increased facial expression</i></li> <li>- <i>increased bodily responses (feet, hands, head)</i></li> <li>- <i>touch/physical contact with others</i></li> <li>- <i>increased energy and concentration</i></li> <li>- <i>increased active participation (humming/singing/ dancing/playing instruments)</i></li> <li>- <i>expression of enjoyment, appreciation, humour, pleasure, affection (verbal &amp; non-verbal)</i></li> <li>- <i>spontaneous interaction &amp; initiatives</i></li> <li>- <i>spontaneous expression of authentic emotion</i></li> <li>- <i>fully engaged in the “here and now”</i></li> </ul> |

|         |   |   |   |   |   |   |   |   |   |    |    |    |
|---------|---|---|---|---|---|---|---|---|---|----|----|----|
| Session | 1 | 2 | 3 | 4 | 5 | 6 | 7 | 8 | 9 | 10 | 11 | 12 |
|         |   |   |   |   |   |   |   |   |   |    |    |    |

## RELATIONSHIP SCORE

Name.....

Evaluator.....

**BASELINE RATING SCALE:**

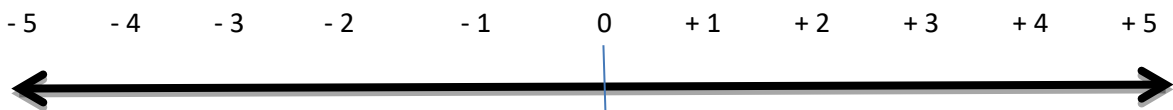

| NEGATIVE RELATIONSHIP INDICATORS OBSERVED      | POSITIVE RELATIONSHIP INDICATORS OBSERVED      |
|------------------------------------------------|------------------------------------------------|
| - 5: very significant evidence of interactions | + 5: very significant evidence of interactions |
| - 4: significant evidence of interactions      | + 4: significant evidence of interactions      |
| - 3: moderate evidence of interactions         | + 3: moderate evidence of interactions         |
| - 2: mild evidence of interactions             | + 2: mild evidence of interactions             |
| - 1: slight evidence of interactions           | + 1: slight evidence of interactions           |
| 0: None observed or asleep                     |                                                |

Interactions may be verbal, non-verbal, musical or all three, and may be with therapist, staff, other group members or family members. One or more of the following letters can be used to denote who the interaction was with:

s (staff)

p (patient) – or r (resident) – or c (client)

r (relative) – or f (family)

t (therapist)

|         |   |   |   |   |   |   |   |   |   |    |    |    |
|---------|---|---|---|---|---|---|---|---|---|----|----|----|
| Session | 1 | 2 | 3 | 4 | 5 | 6 | 7 | 8 | 9 | 10 | 11 | 12 |
|         |   |   |   |   |   |   |   |   |   |    |    |    |
